# Supplementary material for: Evaluation of Pharmacokinetics and Pharmacodynamics of BI 425809, a Novel GlyT1 Inhibitor: Translational Studies
Source: PubMed Central journal article supplement — Clin Transl Sci. 2018 Aug 23;11(6):616–23. doi: 10.1111/cts.12578 (PMC6226115; doi:10.1111/cts.12578), 2018-08-23

**Figure S1. Geometric mean concentration-time profiles of BI 425809 in plasma, after single and multiple dosing in healthy male subjects**

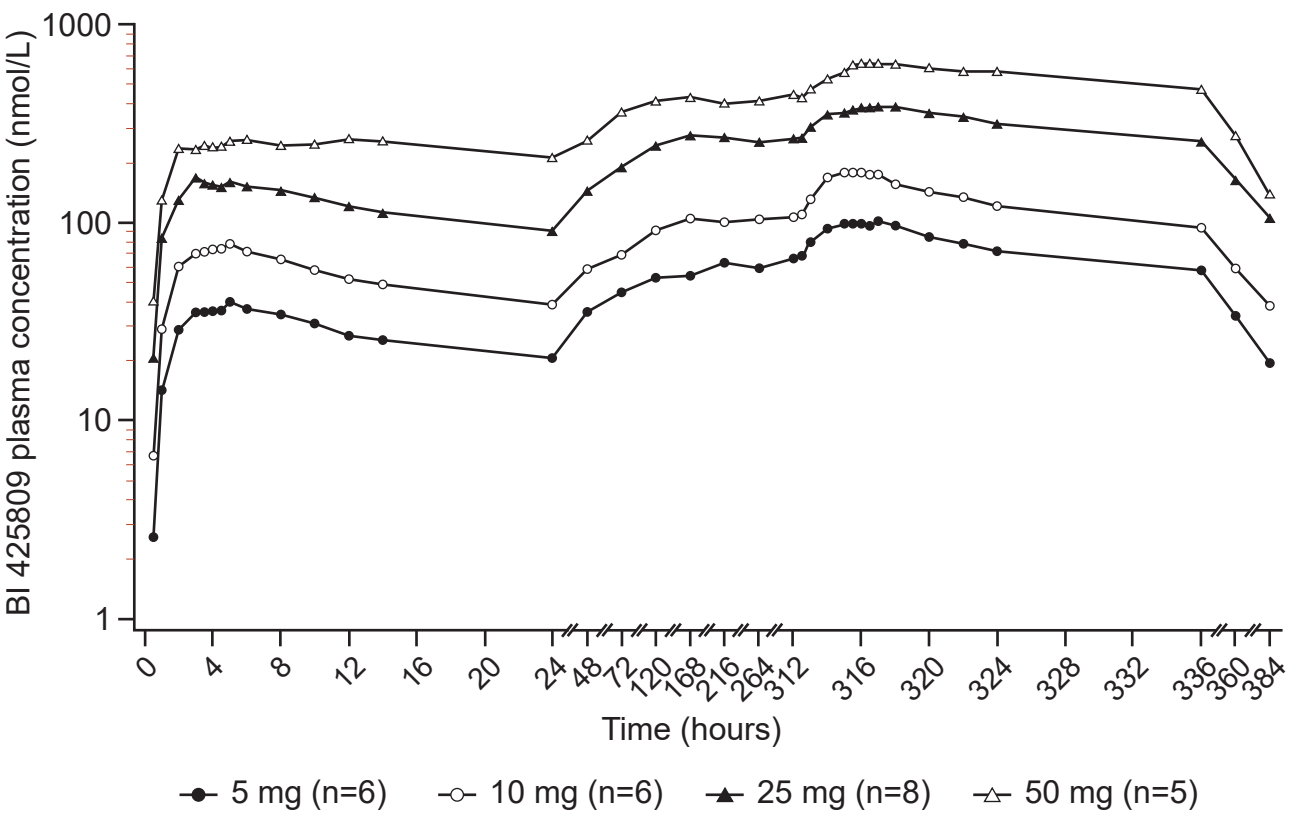

Supplement: CTS-11-616-s001.pdf [file CTS-11-616-s001.pdf]
