# Supplementary material for: Evaluation of Pharmacokinetics and Pharmacodynamics of BI 425809, a Novel GlyT1 Inhibitor: Translational Studies
Source: PubMed Central journal article supplement — Clin Transl Sci. 2018 Aug 23;11(6):616–23. doi: 10.1111/cts.12578 (PMC6226115; doi:10.1111/cts.12578), 2018-08-23
Supplement: CTS-11-616-s002.pdf [file CTS-11-616-s002.pdf]

**Figure S2. Correlation of BI 425809 concentrations in CSF versus plasma at trough in steady state ( $C_{312}$ ; all treatment groups pooled)**

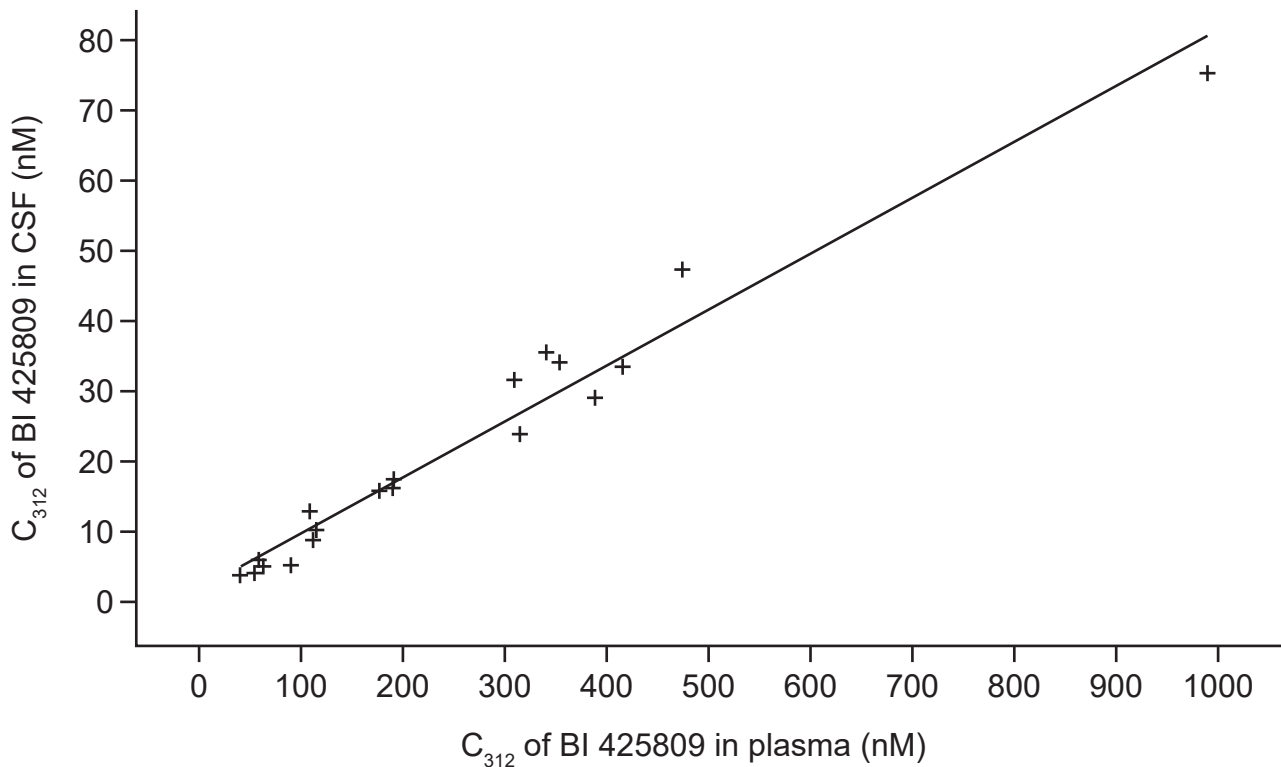

Spearman's correlation coefficient: 0.97.

CSF, cerebrospinal fluid;  $C_{312}$ , concentration of BI 425809 in plasma and CSF at the time point 312 h.
