# Supplementary material for: Evaluation of Pharmacokinetics and Pharmacodynamics of BI 425809, a Novel GlyT1 Inhibitor: Translational Studies
Source: PubMed Central journal article supplement — Clin Transl Sci. 2018 Aug 23;11(6):616–23. doi: 10.1111/cts.12578 (PMC6226115; doi:10.1111/cts.12578), 2018-08-23
Supplement: CTS-11-616-s003.pdf [file CTS-11-616-s003.pdf]

**Figure S3. Percentage change from baseline in individual E<sub>312</sub> of glycine in CSF versus plasma at trough in steady state (C<sub>312</sub>) of BI 425809 in CSF (all treatment groups pooled)**

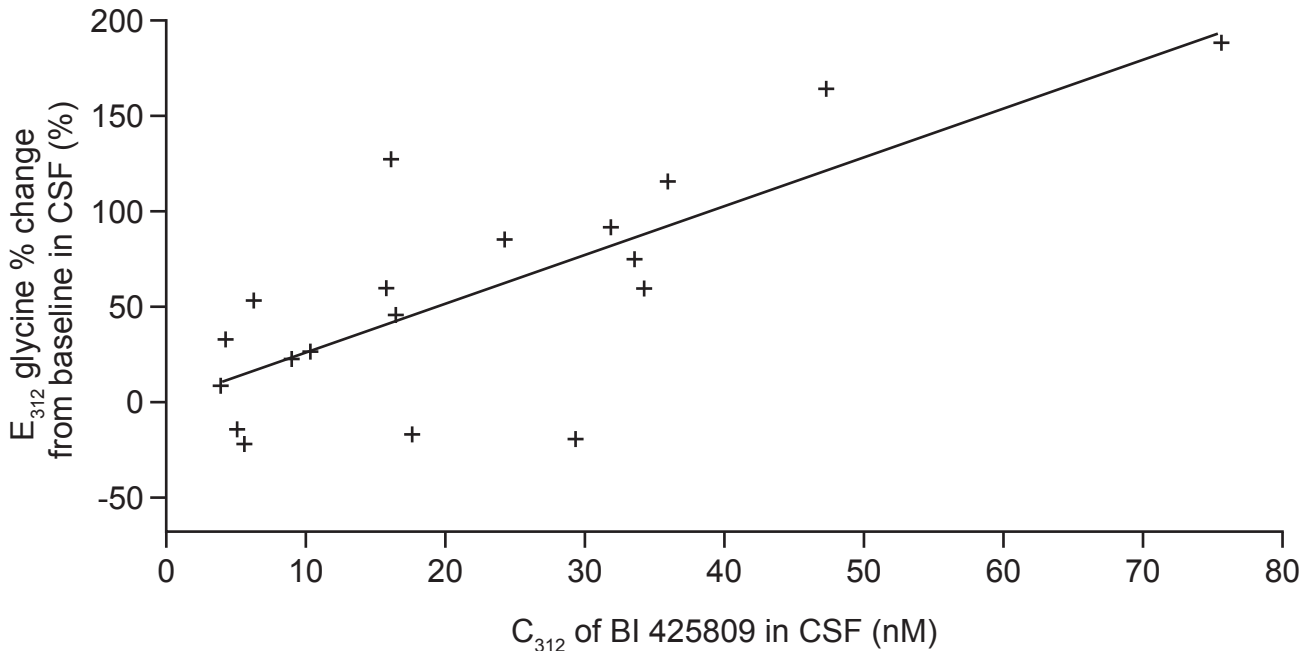

CSF, cerebrospinal fluid; C<sub>312</sub>, concentration of BI 425809 in plasma and CSF at the time point 312 h; E<sub>312</sub>, effect of glycine at the time point 312 hours before the last dose is given.
