# Supplementary material for: Evaluation of Pharmacokinetics and Pharmacodynamics of BI 425809, a Novel GlyT1 Inhibitor: Translational Studies
Source: PubMed Central journal article supplement — Clin Transl Sci. 2018 Aug 23;11(6):616–23. doi: 10.1111/cts.12578 (PMC6226115; doi:10.1111/cts.12578), 2018-08-23
Supplement: CTS-11-616-s004.pdf [file CTS-11-616-s004.pdf]

**Table S1. Demographic characteristics of all subjects**

|                                         | BI 425809     |                |                |                |                 |
|-----------------------------------------|---------------|----------------|----------------|----------------|-----------------|
|                                         | 5 mg<br>(n=6) | 10 mg<br>(n=6) | 25 mg<br>(n=8) | 50 mg<br>(n=5) | Total<br>(n=25) |
| <b>Race, n (%)</b>                      |               |                |                |                |                 |
| Asian                                   | 0 (0.0)       | 0 (0.0)        | 0 (0.0)        | 1 (20.0)       | 1 (4.0)         |
| white                                   | 6 (100.0)     | 6 (100.0)      | 8 (100.0)      | 4 (80.0)       | 24 (96.0)       |
| <b>Hispanic/Latino, n (%)</b>           |               |                |                |                |                 |
| No                                      | 6 (100.0)     | 6 (100.0)      | 7 (87.5)       | 2 (40.0)       | 21 (84.0)       |
| Yes                                     | 0 (0.0)       | 0 (0.0)        | 1 (12.5)       | 3 (60.0)       | 4 (16.0)        |
| <b>Age, median (min-max), years</b>     | 42 (20–52)    | 49 (28–54)     | 48 (36–56)     | 36 (30–53)     | 46 (20–56)      |
| <b>BMI, mean (SD), kg/m<sup>2</sup></b> | 23.7 (1.5)    | 25.5 (3.6)     | 26.8 (2.4)     | 24.7 (3.0)     | 25.3 (2.8)      |
| <b>Smoking status, n (%)</b>            |               |                |                |                |                 |
| Never smoked                            | 2 (33.3)      | 3 (50.0)       | 5 (62.5)       | 4 (80.0)       | 14 (56.0)       |
| Ex-smoker                               | 2 (33.3)      | 3 (50.0)       | 3 (37.5)       | 0 (0.0)        | 8 (32.0)        |
| Currently smokes                        | 2 (33.3)      | 0 (0.0)        | 0 (0.0)        | 1 (20.0)       | 3 (12.0)        |

BMI, body mass index; SD, standard deviation.
